# Supplementary material
Source: PubMed Central journal article supplement (PMC3322979)
Supplement: supp_M111.299537_jbc.M111.299537-1.pdf [file supp_M111.299537_jbc.M111.299537-1.pdf]

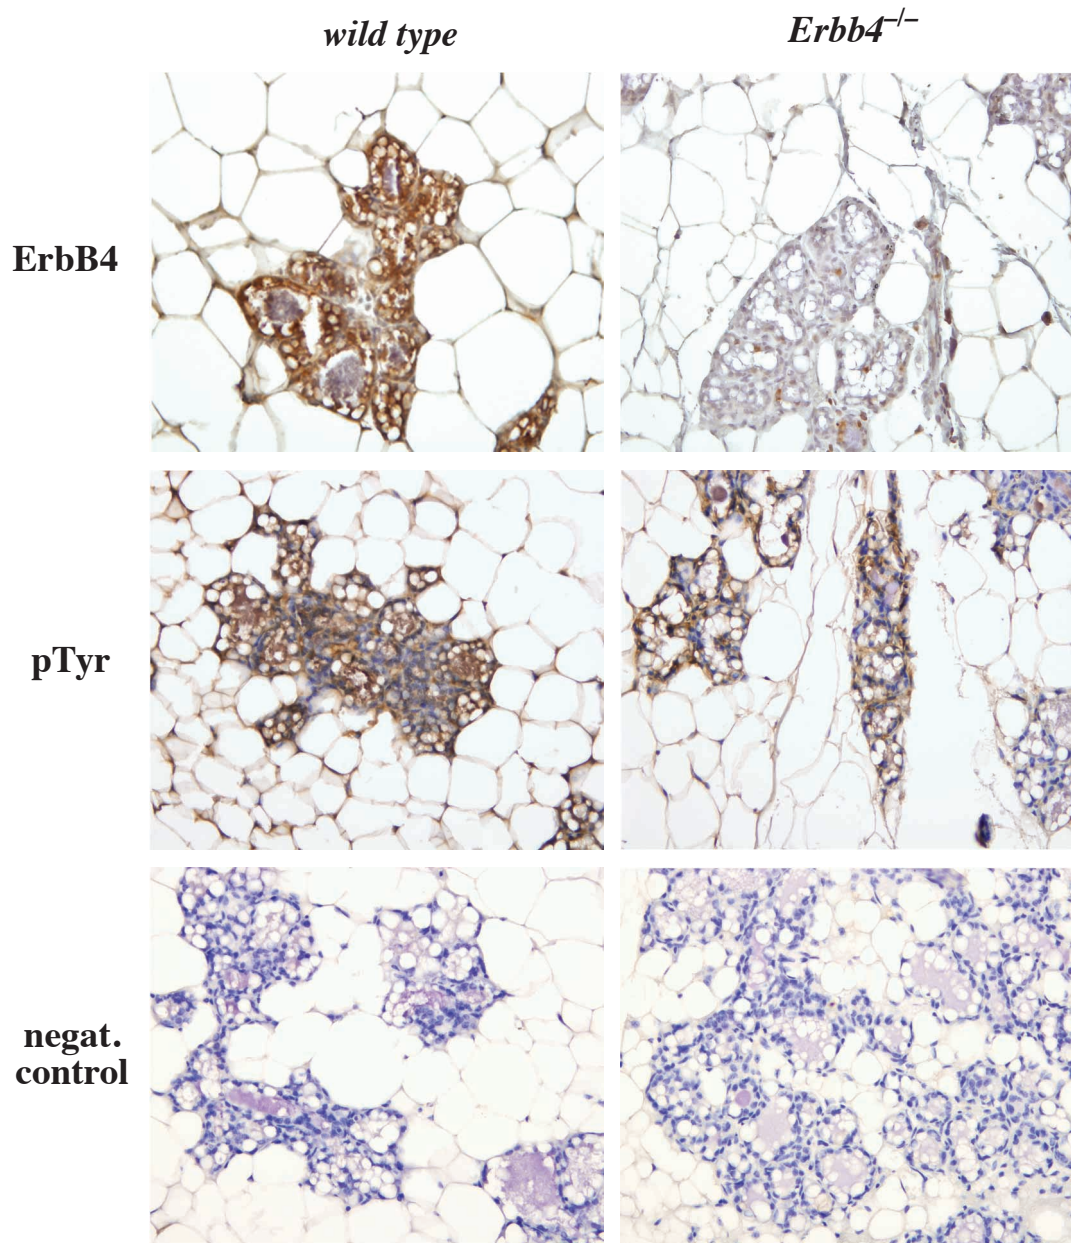

**Figure S1.** Immunohistochemical analysis of L1 lactating mammary glands of wild-type mice and mice with conditional *ErbB4* knock-out under the mammary-specific WAP promoter (*ErbB4<sup>flox/flox</sup>Wap-Cre<sup>+/-</sup>*). Paraffin sections were stained with anti-ErbB4 (sc-283). Anti-phosphotyrosine (pTyr) antibody (4G10) was used as a positive control and nonspecific mouse IgG (clone 3G6) as a negative control.

**A**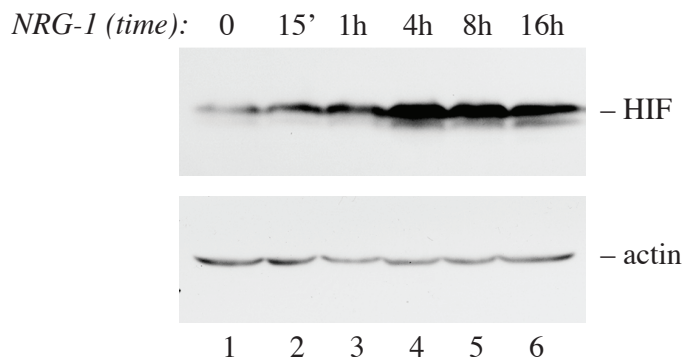**B**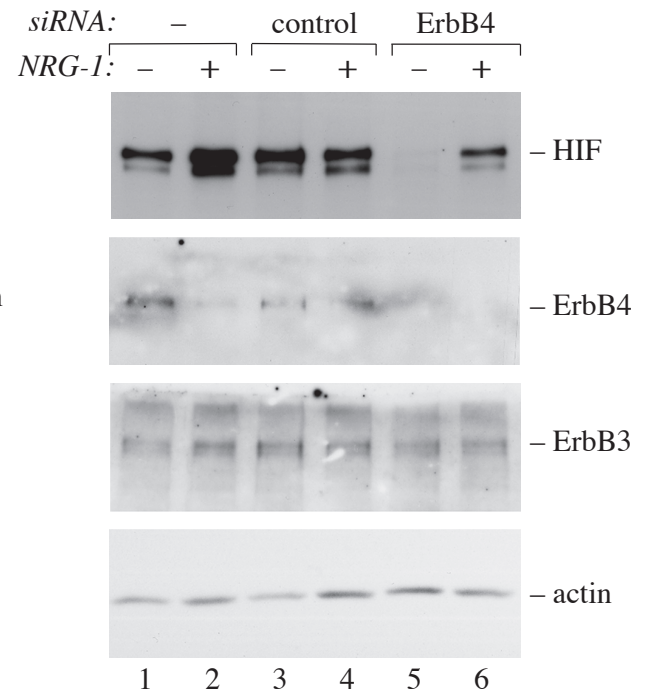

**Figure S2.** A) Time course analysis of the effect of NRG-1 treatment on HIF-1 $\alpha$  protein level. MCF-7 cells were treated with 200  $\mu$ M CoCl<sub>2</sub> for 16 hours and with 50 ng/ml NRG-1 for the indicated periods of time and analyzed for HIF-1 $\alpha$  expression by Western blotting. B) Western analysis of the effect of ErbB4 knock-down by siRNAs on HIF-1 $\alpha$  protein accumulation in the presence of CoCl<sub>2</sub>. MCF-7 cells were transfected with no siRNA, non-specific control siRNA or ErbB4-targeting siRNA. Twenty-four hours later, the cells were treated with 200  $\mu$ M CoCl<sub>2</sub> and with or without 50 ng/ml NRG-1 for another 24 hours.

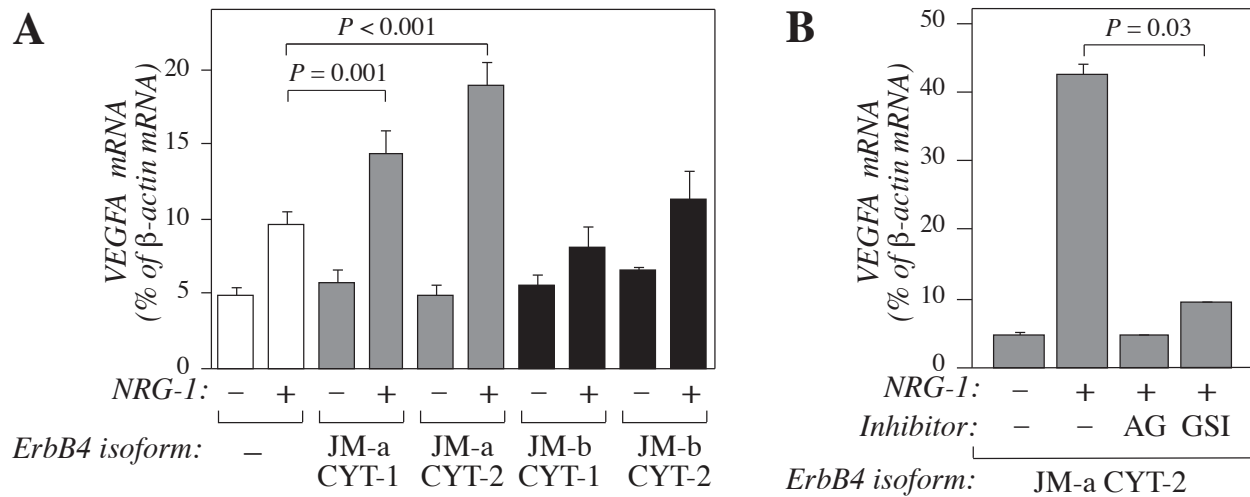

**Figure S3.** Cleaved ErbB4 isoforms promote *VEGFA* expression. A) MCF-7 cells were transfected with an empty vector or plasmids encoding the indicated isoforms of ErbB4. Cells were treated with 0 or 50 ng/ml NRG-1 for 24 hours in 0% FCS. *VEGFA* mRNA expression was analyzed by real-time RT-PCR. B) MCF-7 transfectants expressing ErbB4 JM-a CYT-2 were treated for 24 hours with 0 or 50 ng/ml NRG-1 to stimulate ErbB4 activity, and with 10  $\mu$ M AG 1478 or 25  $\mu$ M GSI IX, to block ErbB4 kinase activity and proteolytic release of soluble ErbB4 ICD, respectively. *VEGFA* mRNA expression was analyzed by real-time RT-PCR.

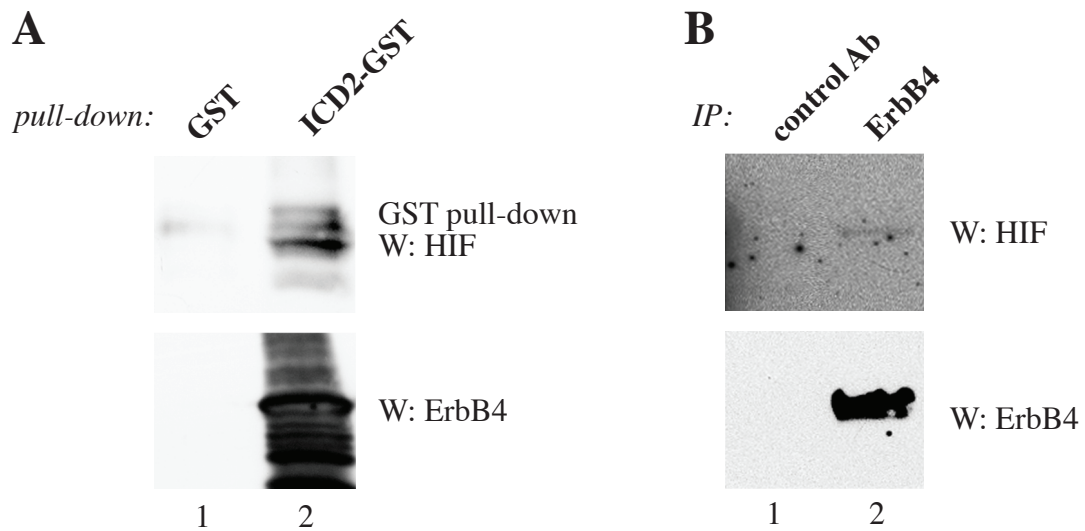

**Figure S4.** Interaction between HIF-1 $\alpha$  and ErbB4. A) Bacterially expressed HIF-1 $\alpha$  co-precipitated with bacterially expressed GST fusion of ErbB4 ICD2 (ICD2-GST) (lane 2) but not with GST alone (lane 1). Western analysis with anti-HIF1 $\alpha$  antibody and anti-ErbB4 antibody is shown. B) Parental MCF-7 cells were cultured for four hours in 1% O<sub>2</sub>. Cell lysates were precipitated with an antibody against the Flag epitope (control Ab) or with anti-ErbB4 followed by Western blotting with anti-HIF-1 $\alpha$  or anti ErbB4.

| ERBB4 correlations           |         |         |          |          |          |           |           |           |           |
|------------------------------|---------|---------|----------|----------|----------|-----------|-----------|-----------|-----------|
| Normal tissue                | EPO (n) | EPO (r) | EPO (p)  | CAIX (n) | CAIX (r) | CAIX (p)  | GLUT1 (n) | GLUT1 (r) | GLUT1 (p) |
| adipose tissue               | 2       |         |          | 2        |          |           | 2         |           |           |
| bladder                      | 17      | -0,053  | 0,84     | 17       | 0,118    | 0,65      | 17        | 0,599     | 0,011     |
| blood lymphoid cell          | 41      | -0,112  | 0,49     | 41       | -0,046   | 0,78      | 41        | 0,082     | 0,61      |
| blood myeloid cell           | 24      | 0,415   | 0,044    | 25       | -0,414   | 0,039     | 26        | 0,165     | 0,42      |
| blood unspecified leukocyte  | 2       |         |          | 2        |          |           | 2         |           |           |
| blood vessel                 | 2       |         |          | 2        |          |           | 2         |           |           |
| bone                         | 4       | -0,905  |          | 4        | 0,872    |           | 4         | -0,98     |           |
| bone marrow                  | 5       | 0,53    |          | 5        | 0,932    |           | 5         | 0,995     |           |
| bone marrow lymphoid cell    | 43      | -0,133  | 0,4      | 43       | 0,146    | 0,35      | 43        | 0,383     | 0,011     |
| bone marrow myeloid cell     | 6       | 0,702   | 0,12     | 6        | 0,363    | 0,48      | 6         | -0,512    | 0,3       |
| breast                       | 10      | -0,234  | 0,52     | 10       | 0,467    | 0,17      | 10        | 0,323     | 0,36      |
| colorectal                   | 21      | 0,215   | 0,35     | 21       | 0,078    | 0,74      | 21        | 0,235     | 0,31      |
| endocrine system             | 19      | 0,164   | 0,5      | 21       | -0,123   | 0,6       | 24        | 0,445     | 0,029     |
| heart                        | 36      | 0,114   | 0,51     | 43       | 0,469    | 0,0015    | 46        | 0,04      | 0,8       |
| kidney                       | 25      | 0,271   | 0,19     | 26       | 0,445    | 0,023     | 27        | 0,459     | 0,016     |
| liver                        | 14      | 0,186   | 0,53     | 14       | 0,412    | 0,14      | 17        | -0,19     | 0,47      |
| lymphatic system             | 30      | -0,021  | 0,91     | 35       | -0,171   | 0,33      | 35        | -0,02     | 0,9       |
| muscle                       | 105     | 0,043   | 0,67     | 105      | 0,333    | 0,00051   | 105       | 0,383     | 0,00055   |
| nervous system               | 210     | 0,137   | 0,047    | 222      | 0,207    | 0,0019    | 227       | 0,092     | 0,17      |
| other GI                     | 12      | 0,192   | 0,55     | 12       | 0,712    | 0,0094    | 12        | -0,05     | 0,88      |
| other urogenital system      |         |         |          | 3        |          |           | 3         |           |           |
| ovary                        | 12      | 0,14    | 0,66     | 12       | -0,302   | 0,34      | 12        | 0,153     | 0,63      |
| pancreas                     | 20      | 0,121   | 0,61     | 21       | 0,255    | 0,27      | 21        | 0,375     | 0,094     |
| placenta                     | 8       | 0,143   | 0,74     | 12       | 0,078    | 0,81      | 13        | -0,233    | 0,44      |
| prostate                     | 68      | 0,345   | 0,004    | 71       | 0,145    | 0,23      | 71        | 0,399     | 0,00057   |
| respiratory system           | 177     | 0,099   | 0,19     | 181      | 0,376    | 0,0000019 | 181       | 0,426     | 2,2E-09   |
| salivary gland               | 3       |         |          | 4        | 0,905    |           | 5         | -0,28     |           |
| skin                         | 5       | 0,971   |          | 5        | 0,662    |           | 5         | 0,904     |           |
| testis                       | 17      | -0,025  | 0,92     | 19       | -0,078   | 0,75      | 19        | 0,203     | 0,41      |
| tongue                       | 2       |         |          | 2        |          |           | 2         |           |           |
| uterus                       | 31      | 0,471   | 0,0075   | 32       | 0,403    | 0,022     | 33        | 0,362     | 0,039     |
| Normal tissues               | 971     |         |          | 1018     |          |           | 1037      |           |           |
| Normal with P < 0.05         | 333     |         |          | 646      |          |           | 501       |           |           |
| Cancer                       | EPO (n) | EPO (r) | EPO (p)  | CAIX (n) | CAIX (r) | CAIX (p)  | GLUT1 (n) | GLUT1 (r) | GLUT1 (p) |
| adrenal gland cancer         | 11      | -0,087  | 0,8      | 11       | -0,3607  | 0,28      | 11        | -0,001    | 1         |
| ALL                          | 716     | 0,198   | 9,90E-08 | 716      | 0,1893   | 3,40E-07  | 714       | 0,176     | 2,20E-06  |
| AML                          | 377     | -0,086  | 0,095    | 377      | 0,2197   | 1,70E-05  | 379       | 0,074     | 0,15      |
| bladder cancer               | 75      | 0,346   | 0,0023   | 100      | 0,0617   | 0,54      | 100       | -0,1418   | 0,16      |
| breast cancer                | 373     | 0,062   | 0,24     | 373      | -0,0567  | 0,28      | 373       | 0,0117    | 0,82      |
| colorectal cancer            | 132     | 0,029   | 0,74     | 132      | -0,0313  | 0,72      | 132       | 0,2231    | 0,01      |
| glioma                       | 219     | 0,034   | 0,62     | 219      | -0,1063  | 0,12      | 219       | -0,0222   | 0,74      |
| head and neck cancer         | 3       |         |          | 3        |          |           | 3         |           |           |
| kidney cancer                | 53      | 0,151   | 0,28     | 53       | -0,03    | 0,83      | 53        | 0,1174    | 0,4       |
| lung cancer                  | 346     | 0,136   | 0,012    | 346      | 0,0868   | 0,11      | 346       | 0,0089    | 0,87      |
| lung carcinoid tumor         | 20      | -0,223  | 0,34     | 20       | 0,1136   | 0,63      | 20        | -0,0226   | 0,92      |
| lymphoma                     | 103     | -0,141  | 0,16     | 103      | 0,0141   | 0,89      | 103       | 0,1015    | 0,31      |
| melanoma                     | 11      | -0,526  | 0,097    | 11       | 0,3859   | 0,24      | 11        | -0,0833   | 0,8       |
| mesothelioma                 | 44      | 0,273   | 0,073    | 44       | -0,0701  | 0,65      | 44        | 0,1367    | 0,38      |
| myeloma                      | 255     | -0,07   | 0,27     | 255      | -0,0308  | 0,62      | 255       | 0,1538    | 0,014     |
| neuroblastoma                | 22      | -0,066  | 0,77     | 22       | 0,4302   | 0,046     | 22        | 0,4132    | 0,056     |
| other GI cancer              | 12      | 0,201   | 0,53     | 12       | -0,4126  | 0,18      | 12        | 0,5271    | 0,078     |
| other neuroectodermal cancer | 80      | -0,132  |          | 81       | -0,0038  |           | 81        | 0,0541    |           |
| other urogenital tumor       | 11      | -0,329  | 0,32     | 11       | -0,478   | 0,14      | 11        | -0,5956   | 0,053     |
| ovarian cancer               | 239     | 0,095   | 0,14     | 239      | -0,0593  | 0,36      | 239       | 0,1521    | 0,019     |
| pancreatic cancer            | 23      | 0,491   | 0,017    | 23       | -0,1606  | 0,46      | 23        | -0,0982   | 0,66      |
| prostate cancer              | 237     | 0,049   | 0,45     | 239      | 0,0327   | 0,62      | 241       | 0,2049    | 0,0014    |
| sarcoma                      | 64      | 0,078   | 0,54     | 64       | 0,4035   | 0,00095   | 64        | 0,4014    | 0,001     |
| testicular cancer            | 75      | 0,264   | 0,022    | 75       | 0,1194   | 0,31      | 75        | -0,1509   | 0,2       |
| thyroid cancer               | 9       | -0,32   | 0,4      | 9        | -0,1136  | 0,77      | 9         | 0,1335    | 0,73      |
| uterine cancer               | 62      | 0,107   | 0,41     | 62       | 0,0075   | 0,95      | 62        | -0,0161   | 0,9       |
| Cancers                      | 3572    |         |          | 3600     |          |           | 3602      |           |           |
| Cancers with P < 0.05        | 1235    |         |          | 1179     |          |           | 1645      |           |           |
| TOTAL (normal + cancer)      | 4543    |         |          | 4618     |          |           | 4639      |           |           |
| TOTAL P < 0.05               | 1568    |         |          | 1825     |          |           | 2146      |           |           |

**Table S1.** Correlation of *ERBB4* expression with the expression of HIF-1  $\alpha$ -regulated genes *in vivo*. mRNA expression levels of *ERBB4* and HIF-1  $\alpha$ -regulated genes *EPO*, *CAIX* and *GLUT1* were analyzed from published microarray data. Pearson's correlations from normal human tissues and clinical cancer samples were analyzed separately for each tissue and cancer type. Pearson's correlations (r), number of samples (n) and probability value associated with correlation (p) are displayed.

| <b>NRG1 correlations</b>     |                |                |                |                 |                 |                 |                  |                  |                  |
|------------------------------|----------------|----------------|----------------|-----------------|-----------------|-----------------|------------------|------------------|------------------|
| <b>Normal tissue</b>         | <b>EPO (n)</b> | <b>EPO (r)</b> | <b>EPO (p)</b> | <b>CAIX (n)</b> | <b>CAIX (r)</b> | <b>CAIX (p)</b> | <b>GLUT1 (n)</b> | <b>GLUT1 (r)</b> | <b>GLUT1 (p)</b> |
| adipose tissue               | 2              |                |                | 2               |                 |                 | 2                |                  |                  |
| bladder                      | 17             | -0,127         | 0,63           | 17              | 0,095           | 0,72            | 17               | 0,357            | 0,16             |
| blood lymphoid cell          | 41             | 0,136          | 0,39           | 41              | 0,148           | 0,36            | 41               | -0,147           | 0,36             |
| blood myeloid cell           | 24             | 0,089          | 0,68           | 24              | 0,505           | 0,012           | 24               | 0,083            | 0,7              |
| blood unspecified leukocyte  | 2              |                |                | 2               |                 |                 | 2                |                  |                  |
| blood vessel                 | 2              |                |                | 2               |                 |                 | 2                |                  |                  |
| bone                         | 4              | -0,897         |                | 4               | 0,874           |                 | 4                | -0,991           |                  |
| bone marrow                  | 5              | 0,891          |                | 5               | 0,187           |                 | 5                | 0,261            |                  |
| bone marrow lymphoid cell    | 43             | 0,049          | 0,76           | 43              | 0,173           | 0,27            | 43               | 0,201            | 0,2              |
| bone marrow myeloid cell     | 6              | 0,591          | 0,22           | 6               | 0,783           | 0,066           | 6                | -0,202           | 0,7              |
| breast                       | 10             | -0,186         | 0,61           | 10              | 0,254           | 0,48            | 10               | 0,541            | 0,11             |
| colorectal                   | 21             | 0,27           | 0,24           | 21              | -0,112          | 0,63            | 21               | -0,144           | 0,53             |
| endocrine system             | 19             | 0,091          | 0,71           | 21              | 0,204           | 0,37            | 25               | 0,173            | 0,41             |
| heart                        | 36             | 0,783          | 1,70E-08       | 43              | 0,334           | 0,029           | 46               | 0,681            | 1,90E-07         |
| kidney                       | 25             | 0,324          | 0,11           | 26              | 0,029           | 0,89            | 28               | 0,122            | 0,54             |
| liver                        | 14             | 0,267          | 0,36           | 15              | 0,537           | 0,039           | 18               | 0,222            | 0,38             |
| lymphatic system             | 30             | -0,124         | 0,52           | 36              | 0,068           | 0,69            | 36               | -0,151           | 0,38             |
| muscle                       | 105            | 0,231          | 0,018          | 105             | 0,139           | 0,16            | 105              | 0,194            | 0,048            |
| nervous system               | 210            | -0,036         | 0,6            | 223             | 0,017           | 0,8             | 228              | -0,024           | 0,72             |
| other GI                     | 12             | 0,372          | 0,23           | 12              | 0,608           | 0,036           | 12               | 0,156            | 0,63             |
| other urogenital system      | 3              |                |                | 3               |                 |                 | 3                |                  |                  |
| ovary                        | 12             | 0,619          | 0,032          | 12              | -0,555          | 0,061           | 12               | -0,109           | 0,74             |
| pancreas                     | 20             | -0,253         | 0,28           | 22              | 0,513           | 0,015           | 22               | 0,476            | 0,025            |
| placenta                     | 9              | -0,157         | 0,69           | 13              | 0,544           | 0,055           | 14               | 0,234            | 0,42             |
| prostate                     | 68             | 0,326          | 0,0066         | 71              | 0,379           | 0,0011          | 71               | 0,61             | 1,70E-08         |
| respiratory system           | 177            | 0,024          | 0,76           | 181             | 0,072           | 0,33            | 181              | -0,106           | 0,16             |
| salivary gland               | 3              |                |                | 4               | 0,718           |                 | 5                | 0,285            |                  |
| skin                         | 5              | -0,286         |                | 5               | -0,034          |                 | 5                | -0,604           |                  |
| testis                       | 17             | -0,018         | 0,95           | 19              | 0,116           | 0,64            | 19               | 0,053            | 0,83             |
| tongue                       | 2              |                |                | 2               |                 |                 | 2                |                  |                  |
| uterus                       | 31             | 0,345          | 0,058          | 32              | 0,319           | 0,075           | 33               | 0,11             | 0,54             |
| Normal tissues               | 975            |                |                | 1022            |                 |                 | 1042             |                  |                  |
| Normal with P < 0.05         | 333            |                |                | 646             |                 |                 | 503              |                  |                  |
| <b>Cancer</b>                | <b>EPO (n)</b> | <b>EPO (r)</b> | <b>EPO (p)</b> | <b>CAIX (n)</b> | <b>CAIX (r)</b> | <b>CAIX (p)</b> | <b>GLUT1 (n)</b> | <b>GLUT1 (r)</b> | <b>GLUT1 (p)</b> |
| adrenal gland cancer         | 11             | -0,1647        | 0,63           | 11              | -0,23           | 0,5             | 11               | -0,171           | 0,61             |
| ALL                          | 716            | 0,0689         | 0,066          | 716             | 0,183           | 7,70E-07        | 714              | 0,13             | 0,00049          |
| AML                          | 377            | -0,0502        | 0,33           | 378             | 0,224           | 1,10E-05        | 379              | 0,108            | 0,035            |
| bladder cancer               | 80             | 0,3908         | 0,00034        | 95              | 0,02            | 0,84            | 95               | -0,089           | 0,39             |
| breast cancer                | 373            | 0,2093         | 4,60E-05       | 373             | 0,329           | 7,50E-11        | 373              | 0,291            | 1,10E-08         |
| colorectal cancer            | 132            | 0,0782         | 0,37           | 132             | -0,118          | 0,18            | 132              | 0,174            | 0,046            |
| glioma                       | 219            | 0,1597         | 0,018          | 219             | 0,197           | 0,0034          | 219              | -0,062           | 0,36             |
| head and neck cancer         | 3              |                |                | 3               |                 |                 | 3                |                  |                  |
| kidney cancer                | 53             | -0,0575        | 0,68           | 53              | -0,38           | 0,005           | 53               | -0,098           | 0,49             |
| lung cancer                  | 346            | 0,2142         | 5,90E-05       | 346             | 0,03            | 0,57            | 346              | 0,211            | 7,50E-05         |
| lung carcinoid tumor         | 20             | -0,1164        | 0,63           | 20              | 0,039           | 0,87            | 20               | -0,048           | 0,84             |
| lymphoma                     | 103            | 0,0914         | 0,36           | 103             | 0,317           | 0,0011          | 103              | 0,401            | 2,70E-05         |
| melanoma                     | 11             | 0,1963         | 0,56           | 11              | 0,269           | 0,42            | 11               | 0,424            | 0,19             |
| mesothelioma                 | 44             | 0,1211         | 0,43           | 44              | -0,251          | 0,1             | 44               | 0,047            | 0,76             |
| myeloma                      | 255            | 0,0074         | 0,9            | 255             | 0,094           | 0,13            | 255              | 0,265            | 1,80E-05         |
| neuroblastoma                | 22             | -0,0882        | 0,7            | 22              | -0,2            | 0,37            | 22               | -0,187           | 0,4              |
| other GI cancer              | 12             | -0,0355        | 0,91           | 12              | 0,906           | 4,90E-05        | 12               | -0,634           | 0,027            |
| other neuroectodermal cancer | 80             | -0,0141        |                | 81              | 0,035           |                 | 81               | 0,17             |                  |
| other urogenital tumor       | 11             | 0,3366         | 0,31           | 11              | 0,288           | 0,39            | 11               | 0,454            | 0,16             |
| ovarian cancer               | 239            | 0,0119         | 0,85           | 239             | 0,015           | 0,82            | 239              | 0,062            | 0,34             |
| pancreatic cancer            | 23             | 0,5611         | 0,0053         | 23              | -0,238          | 0,27            | 23               | -0,406           | 0,055            |
| prostate cancer              | 237            | 0,1947         | 0,0026         | 239             | 0,191           | 0,0031          | 241              | 0,583            | 0                |
| sarcoma                      | 64             | 0,0801         | 0,53           | 64              | 0,036           | 0,78            | 64               | -0,127           | 0,32             |
| testicular cancer            | 75             | 0,0228         | 0,85           | 75              | 0,185           | 0,11            | 75               | 0,033            | 0,78             |
| thyroid cancer               | 9              | -0,0274        | 0,94           | 9               | -0,595          | 0,09            | 9                | -0,206           | 0,6              |
| uterine cancer               | 62             | 0,4672         | 0,00013        | 62              | 0,09            | 0,49            | 62               | 0,159            | 0,22             |
| Cancers                      | 3577           |                |                | 3596            |                 |                 | 3597             |                  |                  |
| Cancers with P < 0.05        | 1240           |                |                | 1180            |                 |                 | 1645             |                  |                  |
| TOTAL (normal + cancer)      | 4552           |                |                | 4618            |                 |                 | 4639             |                  |                  |
| TOTAL with P < 0.05          | 1573           |                |                | 1826            |                 |                 | 2148             |                  |                  |

**Table S2.** Correlation of *NRG1* expression with the expression of HIF-1 $\alpha$ -regulated genes *in vivo*. mRNA expression levels of *NRG1* and HIF-1 $\alpha$ -regulated genes *EPO*, *CAIX* and *GLUT1* were analyzed from published microarray data. Pearson's correlations from normal human tissues and clinical cancer samples were analyzed separately for each tissue and cancer type. Pearson's correlations (r), number of samples (n) and probability value associated with correlation (p) are displayed.
